# Supplementary material for: Logic minimization and rule extraction for identification of functional sites in molecular sequences
Source: Springer Nature journal article supplement (doi:10.1186/1756-0381-5-10), 2012-08-16
Supplement: 13040_2011_68_MOESM3_ESM.pdf [file 13040_2011_68_MOESM3_ESM.pdf]

1. Encode the molecular sequences into binary sequences.

```
graph TD; A[1. Encode the molecular sequences into binary sequences.] --> B[2. Use a feature selection method to reduce the number of variables to an acceptable level.]; B --> C[3. Delete any contradictions that might exist in the reduced binary dataset.]; C --> D[4. Apply a logic minimization technique to obtain the digital rules from the training set.]; D --> E[5. Calculate the score of each of the rules.]; E --> F[6. Calculate the score of each of the examples in the tests set.]; F --> G[7. Select only the test examples with the largest scores as the positive predictions.];
```

2. Use a feature selection method to reduce the number of variables to an acceptable level.

3. Delete any contradictions that might exist in the reduced binary dataset.

4. Apply a logic minimization technique to obtain the digital rules from the training set.

5. Calculate the score of each of the rules.

6. Calculate the score of each of the examples in the tests set.

7. Select only the test examples with the largest scores as the positive predictions.
